# Supplementary material for: Changes in Cardiovascular Biomarkers With Breast Cancer Therapy and Associations With Cardiac Dysfunction
Source: PubMed Central journal article supplement — J Am Heart Assoc. 2020 Jan 21;9(2):e014708. doi: 10.1161/JAHA.119.014708 (PMC7033834; doi:10.1161/jaha.119.014708), 2020-01-21
Supplement: JAH3-9-e014708-s001.pdf [file JAH3-9-e014708-s001.pdf]

# **SUPPLEMENTAL MATERIAL**

## **Data S1.**

### **Supplemental Methods**

#### **Biomarker measurements**

Four biomarkers including high sensitivity cardiac troponin T (hs-cTnT), N-terminal pro-B-type natriuretic peptide (NT-proBNP), placental growth factor (PIGF) and growth differentiation factor 15 (GDF-15) were assessed in all treatment groups. hs-cTnT was measured using the 4<sup>th</sup> generation Elecsys® TnT-hs assay on Cobas® platform (Roche Diagnostics, Mannheim, Germany) which has a coefficient of variation (CV) of <10% at the 99<sup>th</sup> percentile upper reference limit of 14 ng/L, a limit of detection of 5 ng/L and limit of blank of 3 ng/L. NT-proBNP was measured using the Elecsys® NT-proBNP assay on Cobas® platform, which has a CV of 2.9 to 6.1% and measurement range of 5-35,000 ng/L. PIGF was measured using the Elecsys® PIGF immunoassay with a CV of <5% and measurement range of 3-10,000 ng/L. GDF-15 was measured with the Elecsys® GDF-15 immunoassay with a measurement range is 400-20,000 ng/L and CV <10%. GDF-15 reagents were available for a slightly smaller subset of individuals. In addition, myeloperoxidase (MPO) was measured in the Doxorubicin and Doxorubicin+Trastuzumab treatment groups using an ELISA assay (Cleveland HeartLab Inc, Cleveland Ohio) on a Roche Cobas® 6000 platform with a c501 module.

**Table S1. Number of available biomarker measurements in the analysis patient population.**

| Biomarker                                                                                                                                                                           | Median (IQR) number of measurements per patient | Total number of measurements within different intervals from the time of cancer therapy initiation |             |              |              |
|-------------------------------------------------------------------------------------------------------------------------------------------------------------------------------------|-------------------------------------------------|----------------------------------------------------------------------------------------------------|-------------|--------------|--------------|
|                                                                                                                                                                                     |                                                 | <6 months                                                                                          | 6-12 months | 12-24 months | 24-36 months |
| hs-cTnT                                                                                                                                                                             | 5 [4 - 8]                                       | 1238                                                                                               | 393         | 194          | 115          |
| NT-proBNP                                                                                                                                                                           | 5 [4 - 8]                                       | 1231                                                                                               | 392         | 194          | 115          |
| PIGF                                                                                                                                                                                | 5 [4 - 8]                                       | 1219                                                                                               | 391         | 194          | 115          |
| GDF-15                                                                                                                                                                              | 3 [0 - 5]                                       | 753                                                                                                | 247         | 99           | 38           |
| MPO                                                                                                                                                                                 | 5 [4 - 6]                                       | 974                                                                                                | 233         | 174          | 91           |
| <p>GDF-15 was measured in a smaller subset of patients given limitations in the number of reagents; MPO was analyzed only in the Doxorubicin and Doxorubicin+Trastuzumab groups</p> |                                                 |                                                                                                    |             |              |              |

**Table S2. Baseline characteristics stratified according to cancer therapy regimen in the subset of patients with quantitated echocardiograms at baseline and during at least one follow-up visit (N=254).**

| <b>Variable</b>                 | <b>Doxorubicin<br/>(N=155)</b> | <b>Trastuzumab<br/>(N=53)</b> | <b>Doxorubicin+<br/>Trastuzumab<br/>(N=46)</b> |
|---------------------------------|--------------------------------|-------------------------------|------------------------------------------------|
| Age (years)                     | 49 [41 - 57]                   | 52 [45 - 58]                  | 43 [38 - 53]                                   |
| Race, %(N))                     |                                |                               |                                                |
| Black                           | 41 (26.5)                      | 6 (11.3)                      | 14 (30.4)                                      |
| Caucasian/other/unknown         | 114 (73.5)                     | 47 (88.7)                     | 32 (69.6)                                      |
| Breast cancer side, % (N)       |                                |                               |                                                |
| Left                            | 71 (45.8)                      | 21 (39.6)                     | 21 (45.7)                                      |
| Right                           | 79 (51.0)                      | 31 (58.5)                     | 19 (41.3)                                      |
| Bilateral                       | 5 (3.2)                        | 1 (1.9)                       | 6 (13.0)                                       |
| Metastases or recurrence, % (N) | 1 (0.6)                        | 3 (5.7)                       | 0 (0)                                          |
| Breast cancer stage, % (N)      |                                |                               |                                                |
| Stage 1                         | 21 (13.5)                      | 22 (41.5)                     | 9 (19.6)                                       |
| Stage 2                         | 96 (61.9)                      | 24 (45.3)                     | 23 (50)                                        |
| Stage 3                         | 37 (23.9)                      | 4 (7.5)                       | 14 (30.4)                                      |
| Stage 4                         | 1 (0.6)                        | 3 (5.7)                       | 0 (0)                                          |
| Radiation therapy, % (N)        |                                |                               |                                                |
| None                            | 56 (36.4)                      | 23 (43.4)                     | 15 (32.6)                                      |
| Left-sided                      | 46 (29.9)                      | 13 (24.5)                     | 16 (34.8)                                      |
| Right-sided                     | 48 (31.2)                      | 16 (30.2)                     | 11 (23.9)                                      |
| Bilateral                       | 4 (2.6)                        | 1 (1.9)                       | 4 (8.7)                                        |

|                                                                                                                                                                           |                 |                 |                 |
|---------------------------------------------------------------------------------------------------------------------------------------------------------------------------|-----------------|-----------------|-----------------|
| Left ventricular ejection fraction (%)                                                                                                                                    | 53 [51 - 56]    | 53 [52 - 56]    | 54 [53 - 57]    |
| Body mass index (kg/m <sup>2</sup> )                                                                                                                                      |                 |                 |                 |
| <25                                                                                                                                                                       | 60 (38.7)       | 23 (43.4)       | 17 (37)         |
| 25-30                                                                                                                                                                     | 51 (32.9)       | 17 (32.1)       | 16 (34.8)       |
| ≥30                                                                                                                                                                       | 44 (28.4)       | 13 (24.5)       | 13 (28.3)       |
| Systolic blood pressure (mmHg)                                                                                                                                            | 124 [116 - 133] | 127 [116 - 136] | 124 [116 - 134] |
| Diastolic blood pressure (mmHg)                                                                                                                                           | 74 [69 - 81]    | 74 [69 - 81]    | 73 [70 - 79]    |
| Heart rate (bpm)                                                                                                                                                          | 80 [72 - 89]    | 78 [72- 90]     | 79 [73 - 89]    |
| Current or past Smoking , %(N)                                                                                                                                            | 64 (41.8)       | 18 (34)         | 15 (32.6)       |
| History of diabetes mellitus, %(N)                                                                                                                                        | 14 (9)          | 4 (7.5)         | 2 (4.4)         |
| History of hypertension, %(N)                                                                                                                                             | 46 (29.9)       | 21 (39.6)       | 10 (21.7)       |
| History of hyperlipidemia or statin use, %(N)                                                                                                                             | 35 (22.6)       | 8 (15.4)        | 11 (23.9)       |
| Hyperlipidemia, %(N)                                                                                                                                                      | 34 (21.9)       | 8 (15.4)        | 11 (23.9)       |
| Statin use, %(N)                                                                                                                                                          | 15 (9.7)        | 6 (11.3)        | 4 (8.7)         |
| ACEI/ARB or beta-blocker, %(N)                                                                                                                                            | 33 (21.3)       | 10 (18.9)       | 5 (10.9)        |
| ACEI, %(N)                                                                                                                                                                | 17 (11)         | 5 (9.4)         | 2 (4.3)         |
| ARB, %(N)                                                                                                                                                                 | 8 (5.2)         | 5 (9.4)         | 1 (2.2)         |
| Beta-blocker, %(N)                                                                                                                                                        | 11 (7.1)        | 3 (5.7)         | 2 (4.3)         |
| hs-cTnT (pg/mL)                                                                                                                                                           | 3 [3 - 4]       | 3 [3 - 5]       | 3 [3 -4]        |
| NT-proBNP (pg/mL)                                                                                                                                                         | 61 [37 - 100]   | 137 [79 240]    | 62 [31 - 111]   |
| GDF-15 (pg/mL)                                                                                                                                                            | 704 [532 - 908] | 585 [435 - 902] | 599 [523 - 722] |
| PIGF (pg/mL)                                                                                                                                                              | 13 [10 - 16]    | 14 [10 - 17]    | 13 [10 - 16]    |
| MPO (pmol/L)                                                                                                                                                              | 308 [212 - 499] |                 | 344 [247 - 446] |
| Count (%) is presented for categorical variables; median [interquartile range (IQR)] is presented for continuous variables; ACEI=angiotensin-converting enzyme inhibitor, |                 |                 |                 |

ARB=angiotensin receptor blocker; GDF-15=Growth differentiation factor 15; hs-cTnT= High sensitivity cardiac troponin T; MPO=Myeloperoxidase; NT-proBNP= N-terminal pro-B-type natriuretic peptide; PlGF=Placental growth factor; MPO was not measured in the Trastuzumab group

**Table S3. Associations between baseline biomarker levels and changes in LVEF.**

| <b>Biomarker</b>                                                                                                                                                                                                                                                                                                                                                                                      | <b>Change in LVEF</b> |                |
|-------------------------------------------------------------------------------------------------------------------------------------------------------------------------------------------------------------------------------------------------------------------------------------------------------------------------------------------------------------------------------------------------------|-----------------------|----------------|
|                                                                                                                                                                                                                                                                                                                                                                                                       | <b>Beta (95% CI)</b>  | <b>P-value</b> |
| hs-cTnT                                                                                                                                                                                                                                                                                                                                                                                               | 0.1 (-0.5, 0.8)       | 0.73           |
| NT-proBNP                                                                                                                                                                                                                                                                                                                                                                                             | 0.2 (-0.3, 0.7)       | 0.38           |
| PIGF                                                                                                                                                                                                                                                                                                                                                                                                  | 0.0 (-0.8, 0.9)       | 0.93           |
| GDF-15                                                                                                                                                                                                                                                                                                                                                                                                | 0.2 (-0.8, 1.1)       | 0.76           |
| MPO                                                                                                                                                                                                                                                                                                                                                                                                   | -0.2 (-0.6, 0.2)      | 0.39           |
| Biomarker levels were log2 transformed; Beta estimates should be interpreted per doubling of baseline biomarker levels; Associations were adjusted for baseline variables including LVEF, age, hypertension, smoking, BMI and time since treatment initiation (modeled non-parametrically using cubic spline and its effect allowed to vary across treatment groups by including an interaction term) |                       |                |

**Table S4. Associations between changes in biomarker levels and changes in circumferential and longitudinal strain.**

| Biomarker | Circumferential strain (%) |         |                   |         | Longitudinal strain (%) |         |                   |          |
|-----------|----------------------------|---------|-------------------|---------|-------------------------|---------|-------------------|----------|
|           | Contemporaneous            |         | Subsequent Visit  |         | Contemporaneous         |         | Subsequent Visit  |          |
|           | Beta<br>(95% CI)           | P-value | Beta<br>(95% CI)  | P-value | Beta<br>(95% CI)        | P-value | Beta<br>(95% CI)  | P- value |
| hs-cTnT   | 0.5<br>(0.1,1.03)          | 0.023   | 0.4<br>(0.1,0.8)  | 0.026   | 0.1<br>(-0.1,0.4)       | 0.267   | 0.2<br>(0,0.4)    | 0.101    |
| NT-proBNP | 0.4<br>(-0.1,0.8)          | 0.109   | 0.6<br>(0.2,1.0)  | 0.006   | 0<br>(-0.3,0.2)         | 0.862   | 0.1<br>(-0.2,0.4) | 0.575    |
| PIGF      | 0.1<br>(-0.5,0.8)          | 0.665   | 0.3<br>(-0.8,1.5) | 0.559   | -0.3<br>(-1.0,0.3)      | 0.320   | 0<br>(-0.6,0.7)   | 0.950    |
| GDF-15    | 0.2<br>(-0.4,0.9)          | 0.477   | 0.8<br>(-0.1,1.6) | 0.0687  | 0.5<br>(-0.1,1.2)       | 0.089   | 0.1<br>(-0.4,0.6) | 0.663    |
| MPO       | 0.4<br>(0.1,0.8)           | 0.011   | 0.4<br>(-0.2,0.9) | 0.170   | 0.1<br>(-0.2,0.4)       | 0.570   | 0.4<br>(0.1,0.6)  | 0.007    |



Biomarker levels were log<sub>2</sub> transformed; Beta estimates represent the absolute change in the outcome under consideration for each doubling of biomarker levels from baseline to the same (contemporaneous) visit; or the subsequent change in the outcome for each doubling in biomarker value from baseline to the prior visit. Associations were adjusted for baseline variables including cancer therapy regimen, baseline levels of the outcome under consideration, baseline biomarker levels, age, hypertension, smoking, BMI and time since treatment initiation (modeled non-parametrically using a cubic spline, its effect allowed to vary across treatment groups by including an interaction term); GDF-15=Growth differentiation factor 15; hs-cTnT= High sensitivity cardiac troponin T; MPO=Myeloperoxidase; NT-proBNP= N-terminal pro-B-type natriuretic peptide; PlGF=Placental growth factor.

**Table S5. Associations between changes in biomarker levels from baseline to a visit and change in LVEF at the subsequent visit; Interactions with cancer therapy regimen.**

| <b>Biomarker</b>                                                                                                                                                                                                                                                                                                                                                                  | <b>Doxorubicin</b>                      | <b>Trastuzumab</b>                      | <b>Doxorubicin+Trastuzumab</b>          | <b>P-interaction</b> |
|-----------------------------------------------------------------------------------------------------------------------------------------------------------------------------------------------------------------------------------------------------------------------------------------------------------------------------------------------------------------------------------|-----------------------------------------|-----------------------------------------|-----------------------------------------|----------------------|
|                                                                                                                                                                                                                                                                                                                                                                                   | <b>Mean change in LVEF<br/>(95% CI)</b> | <b>Mean change in LVEF<br/>(95% CI)</b> | <b>Mean change in LVEF<br/>(95% CI)</b> |                      |
| hs-cTnT                                                                                                                                                                                                                                                                                                                                                                           | -0.3 (-0.9, 0.2)                        | 0.7 (-0.6, 1.9)                         | -0.6 (-1.6, 0.5)                        | 0.550                |
| NT-proBNP                                                                                                                                                                                                                                                                                                                                                                         | -0.6 (-1.3, 0.1)                        | -0.2 (-0.8, 0.4)                        | -1.3 (-2.0, -0.6)                       | 0.017                |
| PIGF                                                                                                                                                                                                                                                                                                                                                                              | -0.3 (-1.6, 1.0)                        | 2.6 (0.7, 4.4)                          | 1.7 (-0.6, 4.0)                         | 0.270                |
| GDF-15                                                                                                                                                                                                                                                                                                                                                                            | -0.7 (-2.3, 0.9)                        | -0.5 (-2.4, 1.4)                        | 0.8 (-0.7, 2.3)                         | 0.110                |
| MPO                                                                                                                                                                                                                                                                                                                                                                               | 0.6 (-0.1, 1.2)                         | -                                       | -0.2 (-1.4, 1.0)                        | 0.290                |
| <p>Biomarker levels were log<sub>2</sub> transformed; Beta estimates should be interpreted per doubling in biomarker levels from baseline to prior visit; Associations were adjusted for baseline biomarker levels and baseline variables including LVEF, age, hypertension, smoking, BMI and time since treatment initiation (modeled non-parametrically using cubic spline)</p> |                                         |                                         |                                         |                      |

**Table S6. Incremental predictive value of biomarker change variables when added to a baseline clinical model.**

| <b>Biomarker</b>                                                                                                                                                                                                                                                                                                                                                                                       | <b>Clinical model + biomarker</b> | <b>Absolute Change in Concordance index</b> |
|--------------------------------------------------------------------------------------------------------------------------------------------------------------------------------------------------------------------------------------------------------------------------------------------------------------------------------------------------------------------------------------------------------|-----------------------------------|---------------------------------------------|
| hs-cTnT                                                                                                                                                                                                                                                                                                                                                                                                | 0.699                             | 0.005                                       |
| NT-proBNP                                                                                                                                                                                                                                                                                                                                                                                              | 0.724                             | 0.030                                       |
| MPO                                                                                                                                                                                                                                                                                                                                                                                                    | 0.692                             | 0.008                                       |
| NT-proBNP + hs-cTnT                                                                                                                                                                                                                                                                                                                                                                                    | 0.724                             | 0.030                                       |
| <p>All biomarker values were log2 transformed; The clinical model included cancer therapy regimen, LVEF, age, hypertension, body mass index (BMI) and smoking<br/>                     *The clinical model had a concordance index of 0.694 in the overall group, and 0.684 in the combined Doxorubicin and Doxorubicin+Trastuzumab groups (Note: MPO is only available in these treatment groups)</p> |                                   |                                             |

**Table S7. Proportion of patients with elevated hs-cTnT and NT-proBNP at the completion of anthracycline therapy.**

| <b>Biomarkers</b>                                                                                                                                                                                                                                                | <b>N (%)</b> |
|------------------------------------------------------------------------------------------------------------------------------------------------------------------------------------------------------------------------------------------------------------------|--------------|
| hs-cTnT > 5 ng/L                                                                                                                                                                                                                                                 | 156 (91.8)   |
| hs-cTnT >14 ng/L                                                                                                                                                                                                                                                 | 71 (41.8)    |
| NT-proBNP >125 ng/L                                                                                                                                                                                                                                              | 56 (33.1)    |
| NT-proBNP >150 ng/L                                                                                                                                                                                                                                              | 40 (23.7)    |
| NT-proBNP >300 ng/L                                                                                                                                                                                                                                              | 13 (7.7)     |
| <p>For the Doxorubicin+ Trastuzumab group, patients treated with anthracyclines then trastuzumab were included; A total of 170 and 169 measurements were available at the time of completion of doxorubicin therapy for hs-cTnT and NT-proBNP, respectively.</p> |              |

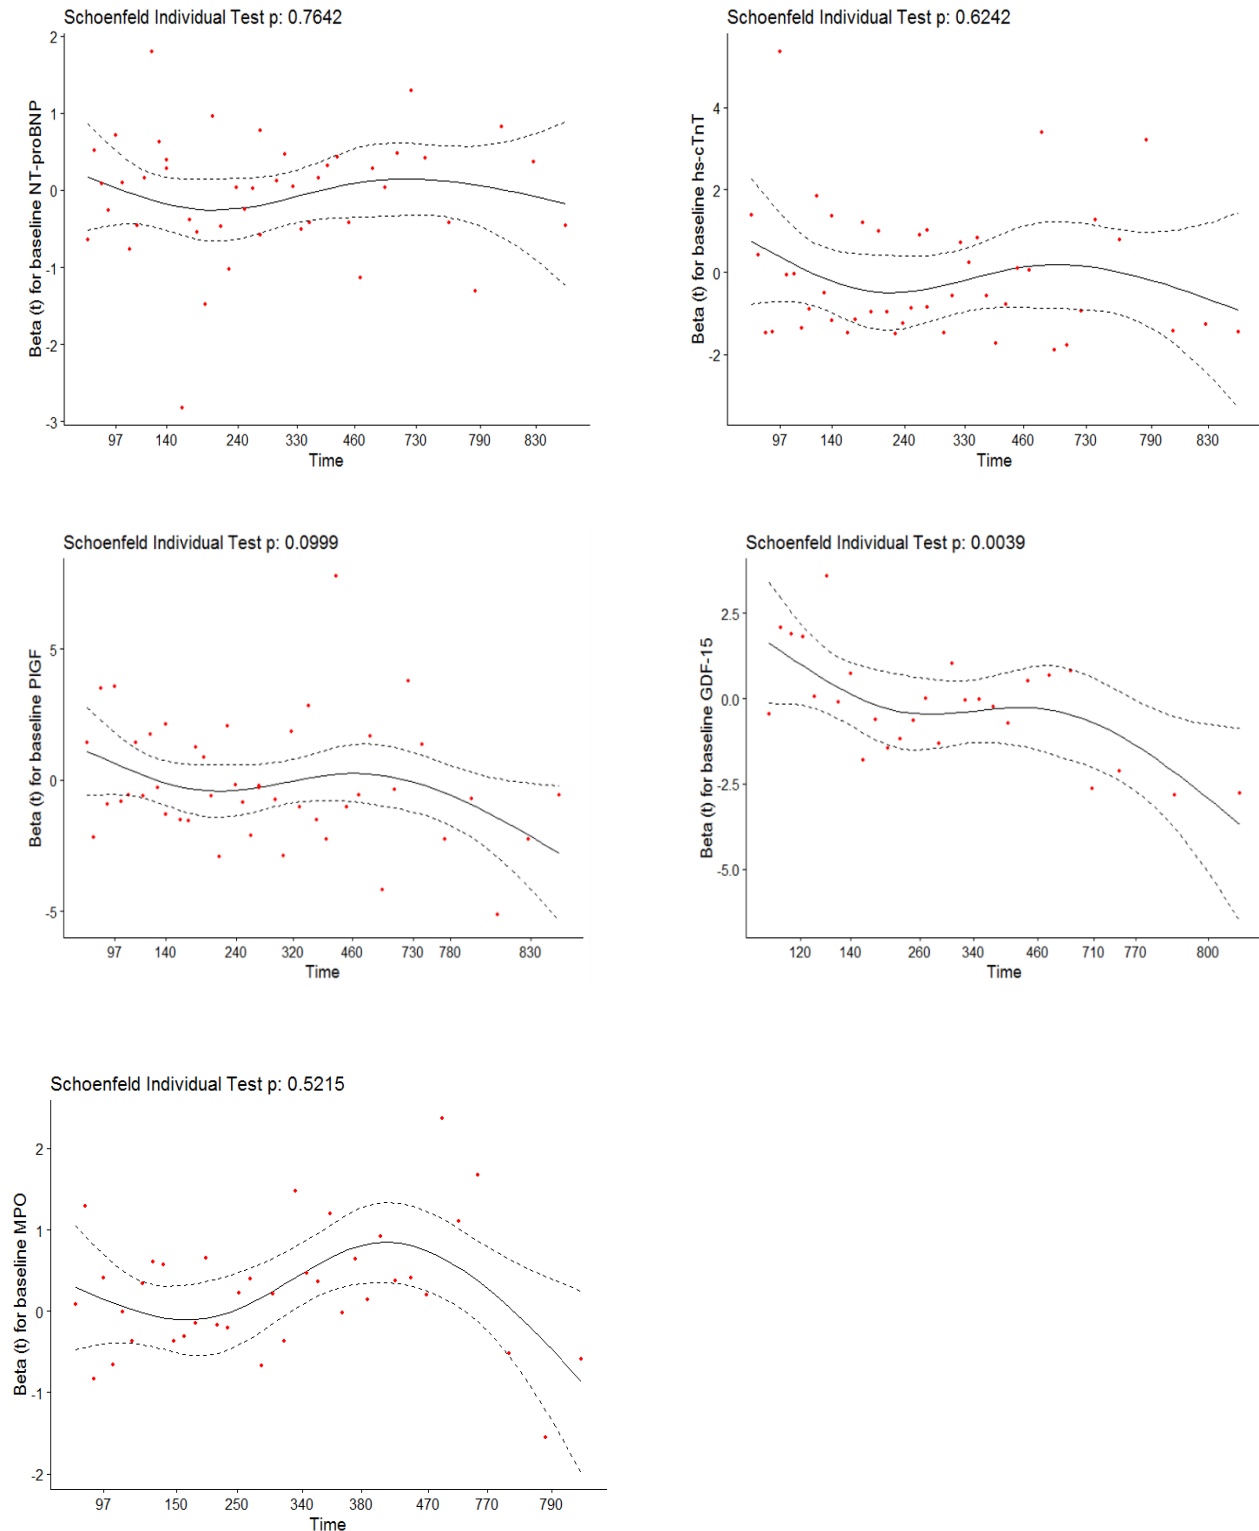

**Figure S1. Plots of Schoenfeld residuals against time for the associations between baseline biomarkers and time to cancer therapy-related cardiac dysfunction.**

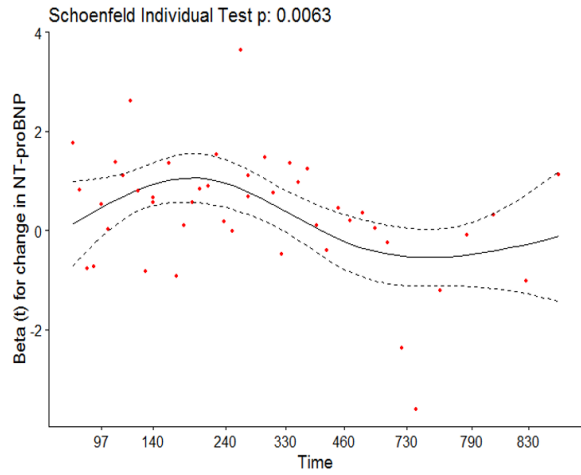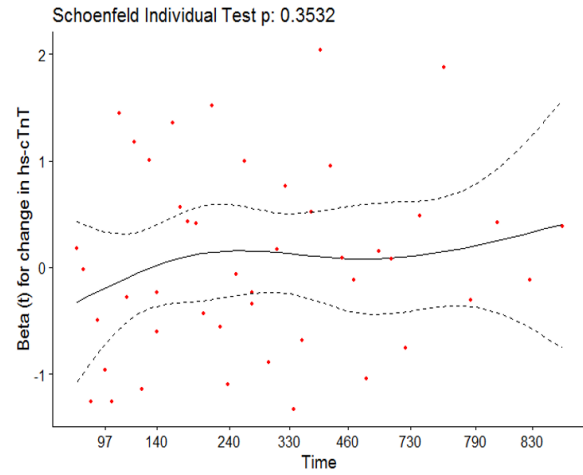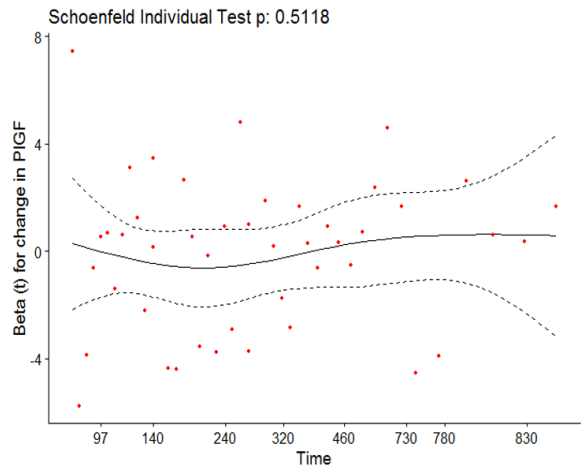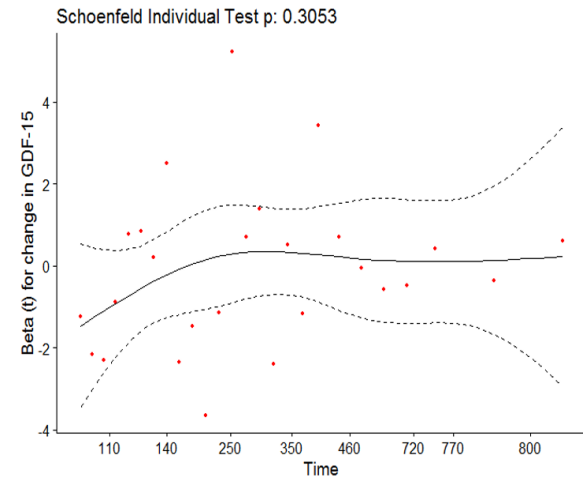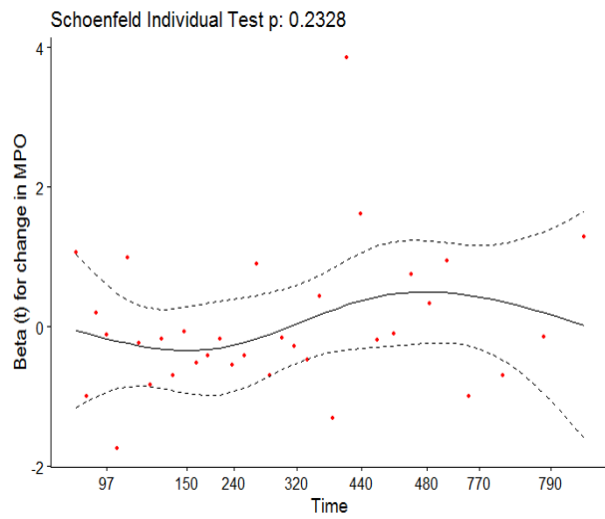

**Figure S2. Plots of Schoenfeld residuals against time for the associations between changes in biomarkers and time to cancer therapy-related cardiac dysfunction.**

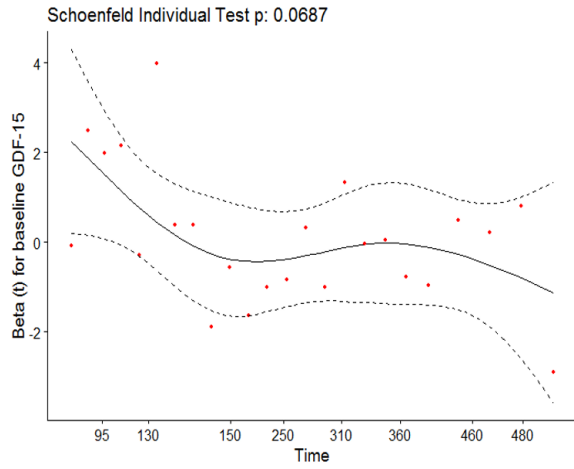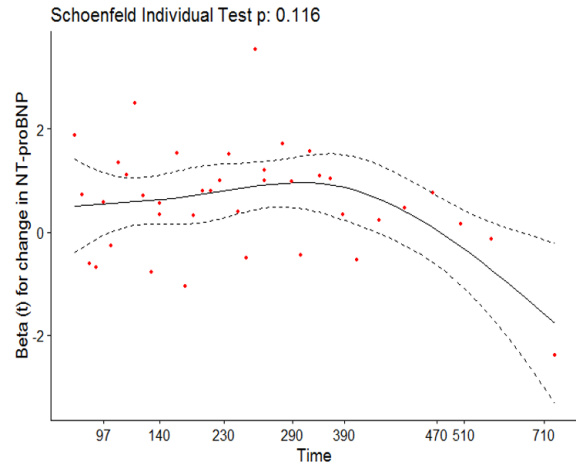

**Figure S3. Plots of Schoenfeld residuals against time for the associations between baseline GDF-15 and change in NT-proBNP, and time to cancer therapy-related cardiac dysfunction limiting maximum follow-up time to 2 years.**

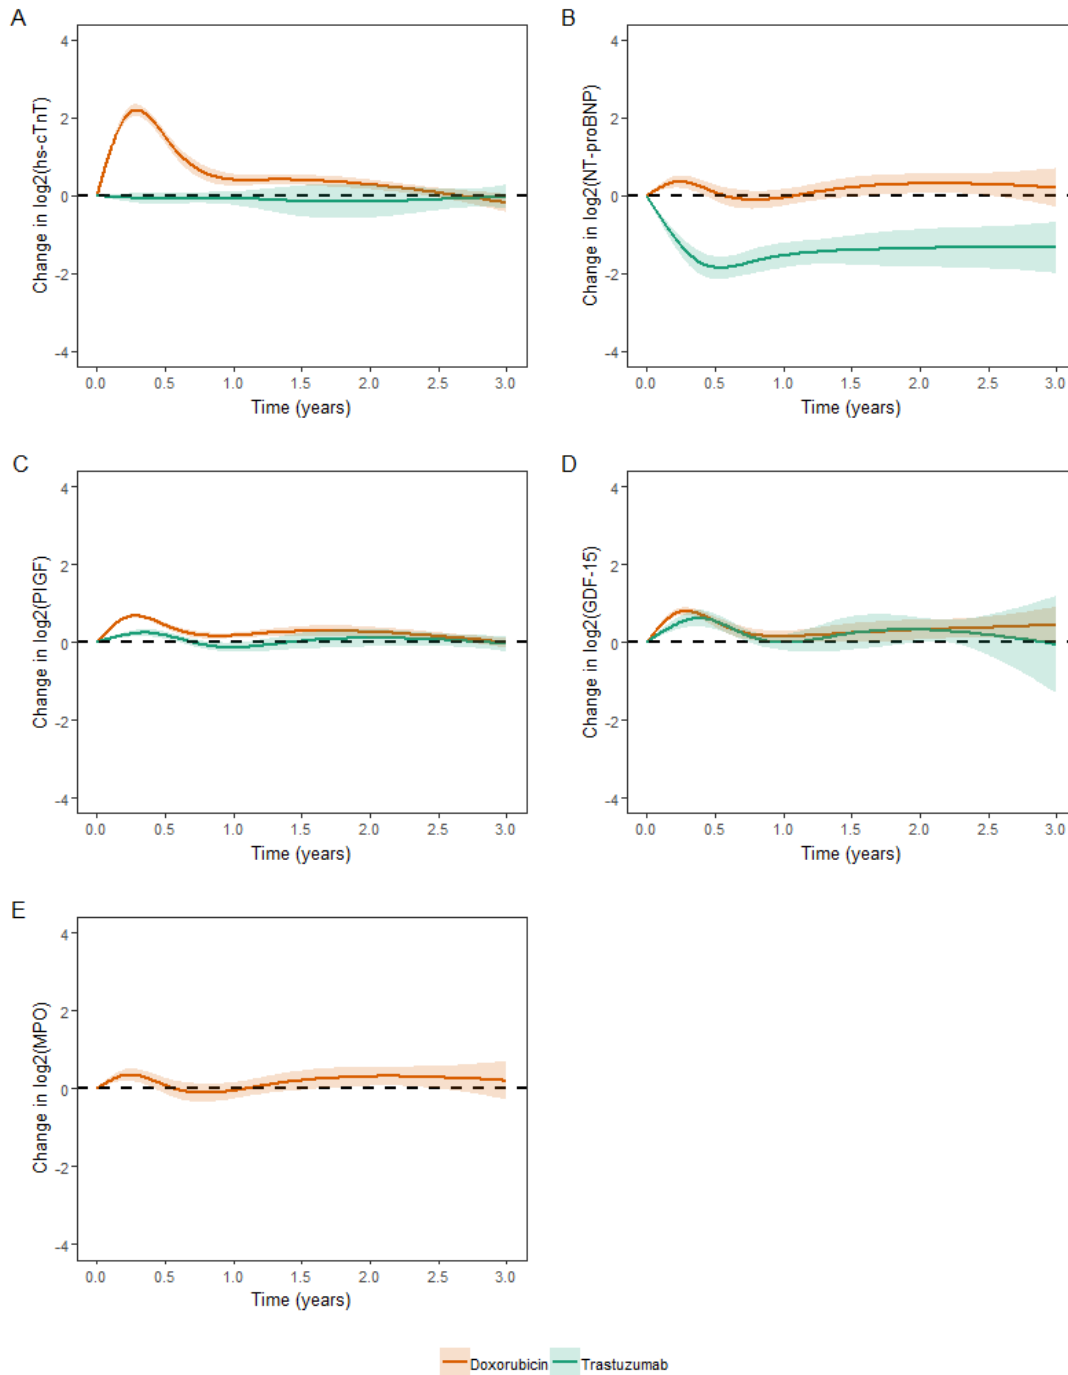

**Figure S4. Mean estimated changes in biomarkers over time according to cancer therapy regimen; the Doxorubicin group includes both those treated with doxorubicin alone and sequential doxorubicin and trastuzumab therapy.** The solid line represents mean estimated changes over time and the width of the surrounding band represents the corresponding 95% confidence interval; biomarker levels were log<sub>2</sub> transformed (a unit increment from baseline should be interpreted as doubling); (A) hs-cTnT, (B) NT-proBNP, (C) PIGF, (D) GDF-15, (E) MPO; GDF-15=Growth differentiation factor 15; hs-cTnT= High sensitivity cardiac troponin T; MPO=Myeloperoxidase; NT-proBNP= N-terminal pro-B-type natriuretic peptide; PIGF=Placental growth factor



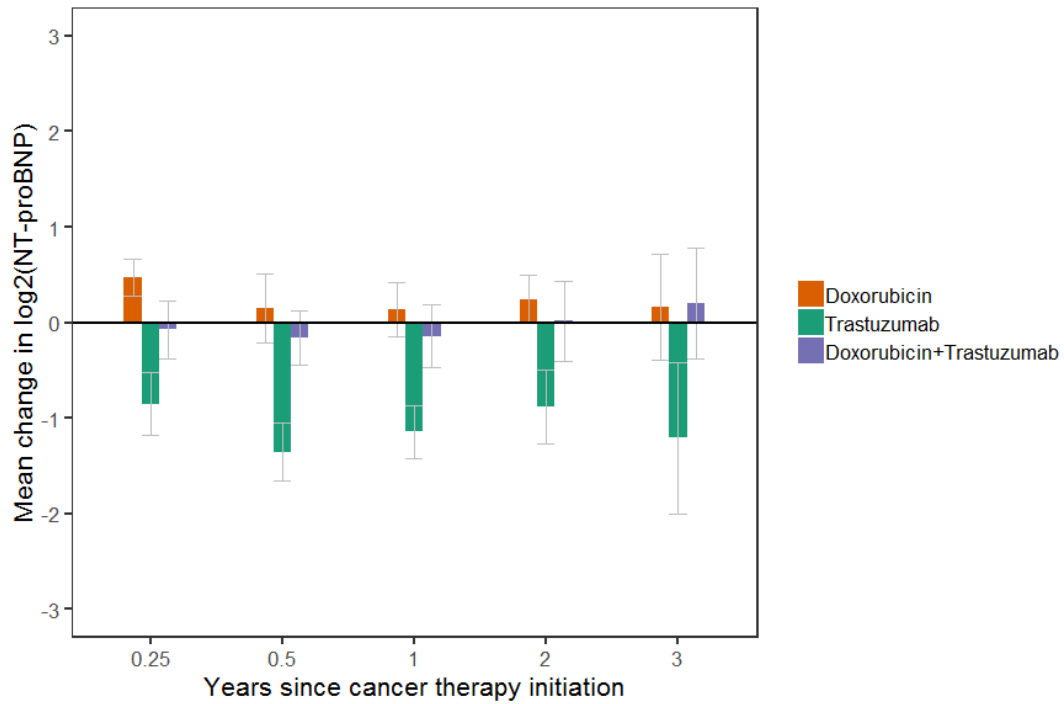

**Figure S5. Covariate-adjusted marginal mean estimates of NT-proBNP change at 3, 6, 12, 24 and 36 months after initiation of cancer therapy according to cancer therapy regimen.** Covariates include baseline NT-proBNP and baseline variables including age, hypertension, BMI, smoking; the effect of time was allowed to differ according to cancer therapy regimen by including a time\*treatment interaction term
